# Supplementary material for: Vacuolization of mucolipidosis type II mouse exocrine gland cells represents accumulation of autolysosomes
Source: PubMed Central journal article supplement — Mol Biol Cell. 2011 Apr 15;22(8):1135–47. doi: 10.1091/mbc.E10-07-0584 (PMC3078071; doi:10.1091/mbc.e10-07-0584), 2011-04-15
Supplement: E10-07-0584_1.pdf [file E10-07-0584_1.pdf]

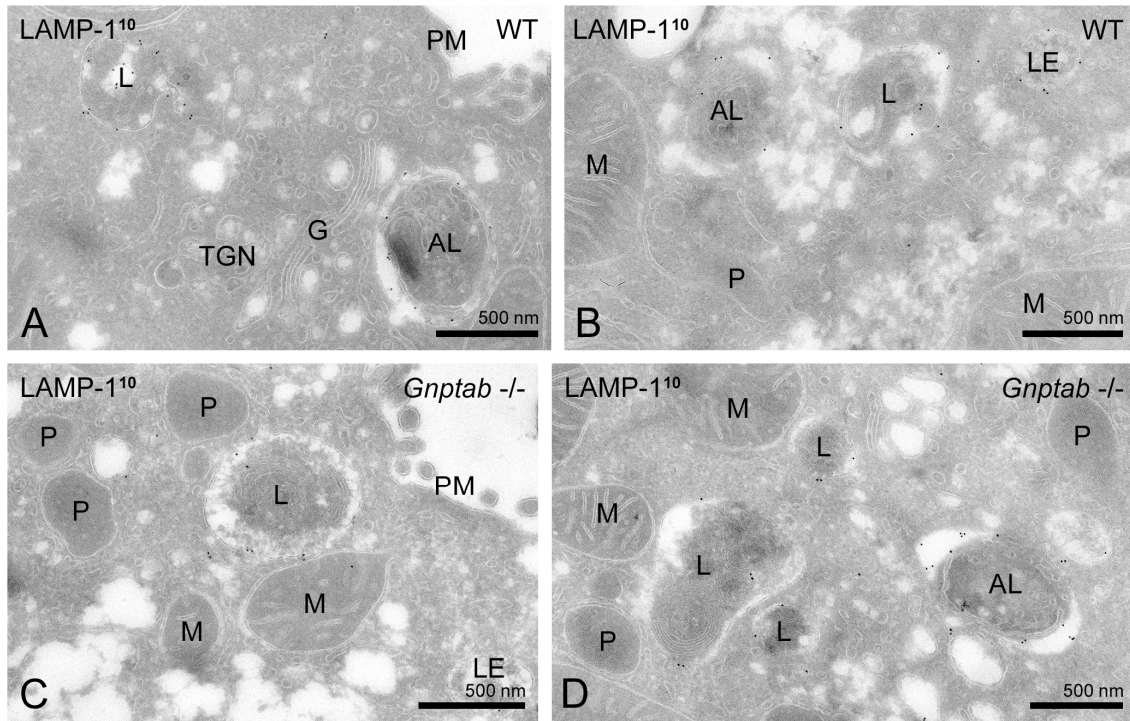

**Supplementary Figure 1.** Liver of *Gnptab*<sup>-/-</sup> mice does not exhibit accumulation of autolysosomes. (A-D) Ultrathin cryosections of wild-type (A-B) and *Gnptab*<sup>-/-</sup> (C-D) mouse liver, immunogold labeled for LAMP-1. In both wild-type and *Gnptab*<sup>-/-</sup> liver cells, typical lysosomes are present, which are identified by their labeling for LAMP-1 and internal membrane sheets, as well as LAMP-1 positive autolysosomes containing cytoplasmic material.

AL, autolysosome; G, Golgi complex; L, lysosome; LE, late endosome; M, mitochondrion; P, peroxisome; PM, plasma membrane.

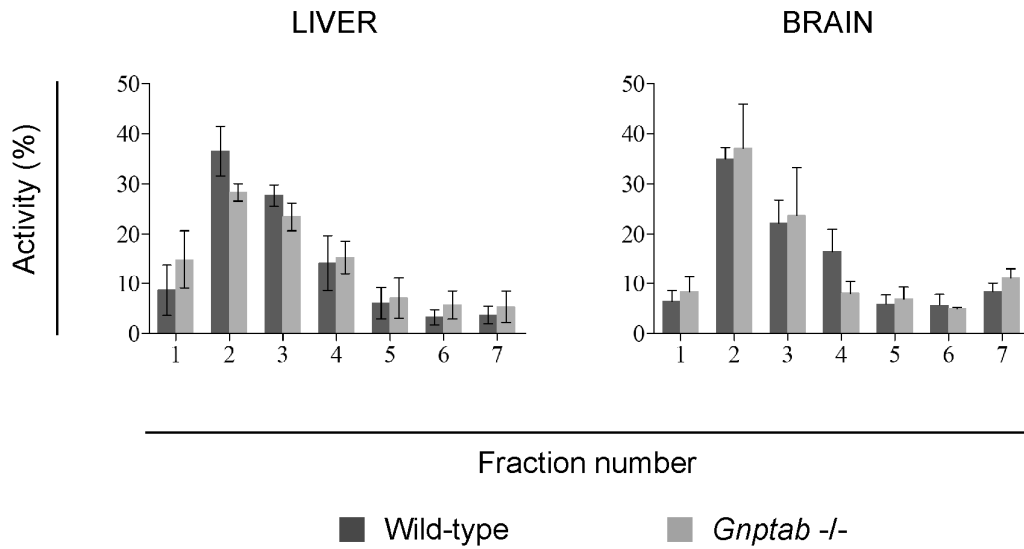

**Supplementary Figure 2.** Distribution of the plasma membrane marker alkaline phosphodiesterase in the Percoll density gradients presented in Figure 5. Graphs represent the distribution of the activity of alkaline phosphodiesterase, determined as described by Beaufay et al. (Beaufay *et al.*, 1974), expressed as a percentage of the total activity recovered in each fraction of the Percoll gradients.

Beaufay, H., Amar-Costesec, A., Thinès-Sempoux, D., Wibo, M., Robbi, M., and Berthet, J. (1974). Analytical study of microsomes and isolated subcellular membranes from rat liver. *J. Cell Biol.* *61*, 213-231.
